# Supplementary material for: Homeoprotein OTX1 and OTX2 involvement in rat myenteric neuron adaptation after DNBS-induced colitis
Source: PeerJ. 2020 Feb 13;8:e8442. doi: 10.7717/peerj.8442 (PMC7024580; doi:10.7717/peerj.8442)
Supplement: Supplemental Information 1 [file peerj-08-8442-s001.xlsx]

## Sheet: myenetric neruon number
Number of myenteric neurons
ileum		colon
CTR	DNBS	CTR	DNBS
0.002048	0.001829	0.001769	0.002167
0.002364	0.001667	0.0014	0.001444
0.002083	0.001833	0.001737	0.001714
0.00375	0.001519	0.0017	0.001156
0.002611	0.001465	0.001875	0.001182
0.002125	0.001321	0.001611	0.001367
0.002294	0.001231	0.001875	0.00215
0.002833	0.002201	0.00185	0.002076
0.00225	0.0023	0.002	0.001923
0.002025	0.0031	0.001909	0.002001
0.002273	0.002333	0.001722	0.00101
0.002792	0.0026	0.002263	0.002069
0.002813	0.002529	0.00225	0.001542
0.002967	0.002204	0.002667	0.000706
0.002409	0.00225	0.002786	0.00166
		0.0025	0.001231
		0.002643	0.002076
		0.002222	0.002023
		0.002136	0.00028
n	0	0	0	0
media	#REF!	#REF!	#REF!	#DIV/0!
err st	#REF!	#REF!	#REF!	#DIV/0!

## Sheet: myenteric neuron soma area
Myenteric neuron soma area
ileum		colon
CTR	DNBS	CTR	DNBS
263.5	195.3	378.1	364.9
266.8	265.1	271.5	290.4
237.2	285.9	363.7	148.1
252.5	298.7	241.8	196.5
239.3	283.1	383.6	229.7
236.2	281.3	312.2	213.6
295.5	246.7	381.2	229.7
260.9	240.8	255.1	163.6
250	183.2	396.9	159.7
307.2	155.2	385.7	159.6
238	167.7	391.3	138.6
326.7	292.2	299.7	299.2
230.1	160.3	222.7	124.7
247.1	199.8	390.9	295.3
261.8	287.9	279.6	149.8
			131.4
			313.3
0	0	0	0
#DIV/0!	#DIV/0!	#DIV/0!	#DIV/0!
#DIV/0!	#DIV/0!	#DIV/0!	#DIV/0!

## Sheet: damage score
damage score
colon		ileum
CTR	DNBS	CTR	ileo DNBS
0.15	5	0.0001	0.0001
0.03	4.63	0.3	0.0001
0.38	4.1	0.0001	0.39
0.1	4	0.0001	0.0001
0.56	5.75	0.4	0.0001
0.06	3.85	0.0001	0.04
0.65	5.2	0.0001	0.01
0.63	5.1	0.01	0.0001
0.05	4.8	0.02	0.0001
0.08	5.55	0.0001	0.7
0.07		0.0001
0.64		0.48
0.75		0.06
0.05		0.0001

## Sheet: MPO activity
MPO activity
colon		ileum
CTR	DNBS	CTR	ileo DNBS
0.084	1.2	0.54	2.05
0.34	2.13	0.34	2.07
0.27	1.17	0.12	1.94
0.55	2.92	0.19	2.16
0.43	2.56	0.25	1.87
0.359	1.96	0.32	1.96

## Sheet: TNFa mRNA
TNFa mRNA
colon		ileum
CTR	DNBS	CTR	ileo DNBS
1	24.38	1	11.33
1.05	18.97	1.3	14.01
1.02	11.55	1.115	27.41
1	23	1.3	7.5
1.05	15	1.115	14.7
1.02	12	1.003	24.2
1.03	18.65	1.03	8.22

## Sheet: IL1B mRNA
IL1b mRNA
colon		ileum
CTR	DNBS	CTR	ileo DNBS
1	53.36	1.03	11.61
1.003	20.62	1.0008	20.37
1.03	12.86	1.03	4.75
1	19	1.0008	16.53
1.003	25	1.03	22.06
1.03	22	1.0008	7.16
1	26	1.11	13
		1.11	15

## Sheet:  IL6 mRNA
IL6 mRNA
colon		ileum
CTR	DNBS	CTR	ileo DNBS
1	33.61	1	5.52
1.05	21.8	1.3	6.54
1.02	34.02	1.115	12.5
1	25	1.115	12.4
1.05	29	1.03	12.1
1.02	21	1	10.06
1.04	30	1.1	9.2

## Sheet:  HIF1a mRNA
HIF1a mRNA
colon		ileum
CTR	DNBS	CTR	ileo DNBS
1	3.69	1.004	2.86
1	2.22	0.992	3.12
1.02	3.41	1.004	0.72
1.0001	1.84	0.992	0.79
0.998	1.686	1.001	5.37
1.001	1.54	1.004	2.3
1.004	2	1.001	1.8

## Sheet: VEGFa mRNA
VEGFa mRNA
colon		ileum
CTR	DNBS	CTR	ileo DNBS
1.003	6.44	0.997	2.51
1	2.36	0.992	2.54
1.003	2.28	1.021	5.24
1	6.73	0.997	1.39
1.02	2.82	0.992	7.49
1	2.73	1.021	3.32
1	7.81474	0.997	3.35
		0.992	6.92
		1.021	1.83

## Sheet: OTX1 mRNA
OTX1mRNA
colon		ileum
CTR	DNBS	CTR	ileo DNBS
1.0322	45.89	1.00135	10.85
1.0322	29.86	1.00135	15.44
1.0322	42.67	1.00135	15.4
1.0322	18.9	1.00135	12.34
1.0322	36	1.00135	10.52
1.0322	71.01	1.00135	10
1.0091	37.27	1.00135	12.51
1.0091	79.34	1.00135	56.12
		1.00695	14
		1.00695	12.01

[truncated: 6 more sheets: OTX2 mRNA, OTX1 WB, OTX2 WB, %OTX2+ neurons, %OTX1+ neurons, comarcatura OTX1-OTX2]
